# Supplementary material
Source: Springer Nature journal article supplement (https://www.springermedizin.de/resource/supplementary/13026_2009_34_MOESM3_ESM.pdf/9644514)

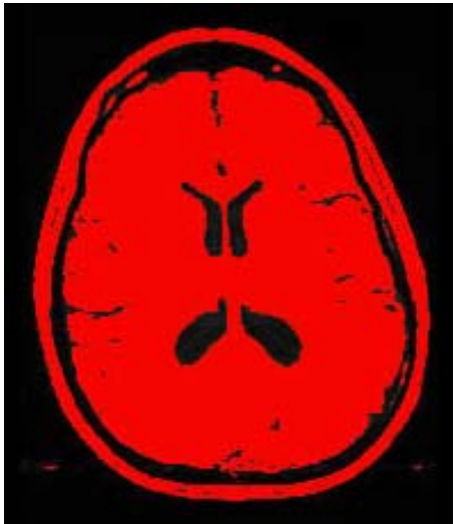

Supplement: MOESM3 [file 9644514]
